# Supplementary material
Source: publisher site journal article supplement (https://www.dovepress.com/article/594549)
Supplement: Supplementary file 1 [file 594549%20Supplementary%20Material.docx]

Table S1. Multivariable logistic regression (additionally adjusted for diabetes mellitus)

| **Parameter** | **Univariate OR (95% CI)** | **P** | **Multivariable aOR (95% CI)** | **P** |
| --- | --- | --- | --- | --- |
| Regimen (Aminoglycosides vs Ceftazidime) | 1.18 (0.62-2.24) | 0.611 | 1.10 (0.55-2.20) | 0.790 |
| Diabetes mellitus | 1.46 (0.78-2.75) | 0.234 | 1.25 (0.62-2.53) | 0.534 |
| Failure of microbiological eradication | 4.15 (1.78-9.67) | 0.001 | 2.78 (1.12-6.56) | 0.025 |
| C-reactive protein | 1.21 (1.07-1.46) | 0.003 | 1.08 (1.01-1.24) | 0.033 |
| Procalcitonin | 1.02 (0.97-1.12) | 0.101 |  |  |
| Large stone burden (≥1cm) | 2.32 (1.23-4.39) | 0.009 | 1.85 (1.00-3.59) | 0.063 |

**Abbreviations:** OR: Odds ratio; aOR: Adjusted odds ratio; CI: Confidence interval.

Table S2. Firth penalized logistic regression (same covariates as primary model)

| **Parameter** | **Multivariable aOR (95% CI)** | **P** |
| --- | --- | --- |
| Regimen (Aminoglycosides vs Ceftazidime) | 1.08 (0.50-2.17) | 0.813 |
| Failure of microbiological eradication | 2.92 (1.12-7.41) | 0.029 |
| C-reactive protein | 1.13 (1.02-1.34) | 0.017 |
| Large stone burden (≥1cm) | 1.95 (0.97-3.92) | 0.060 |

**Abbreviations:** OR: Odds ratio; aOR: Adjusted odds ratio; CI: Confidence interval.

Table S3. Subgroup analysis of postoperative sepsis rates

| **Subgroup** | **Total Patients** | **Sepsis Rate Ceftazidime n/N (%)** | **Sepsis Rate Aminoglycosides n/N (%)** | **P** |
| --- | --- | --- | --- | --- |
| Culture Result |  |  |  |  |
| Negative | 200 | 9/102 (8.82) | 10/98 (10.20) | 0.812 |
| Non-resistant | 176 | 6/72 (8.33) | 10/104 (9.62) | 1.000 |
| Drug-resistant | 44 | 3/36 (8.33) | 1/8 (12.50) | 0.566 |
| Stone Size |  |  |  |  |
| ≥ 1 cm | 149 | 6/69 (8.70) | 8/80 (10.00) | 1.000 |
| < 1 cm | 271 | 12/141 (8.51) | 13/130 (10.00) | 0.681 |
| Combined High-risk |  |  |  |  |
| DR-GNB + Stone ≥ 1 cm | 15 | 1/12 (8.33) | 0/3 (0) | 1 |

**Note:** Combined high-risk analysis is exploratory due to small sample size.
